# Supplementary material for: Regulation of zebrafish melanocyte development by ligand-dependent BMP signaling
Source: eLife. 2019 Dec 23;8:e50047. doi: 10.7554/eLife.50047 (PMC6968919; doi:10.7554/eLife.50047)
Supplement: Figure 1—source data 1. [file elife-50047-fig1-data1.xlsx]

## Sheet: 1B.1
Wild Type	gdf6a(lf)
125	203
154	226
185	250

## Sheet: 1B.2
Wild Type	gdf6a(lf)
8.25104	54.9232
3.78439	33.9583
6.85364	49.2204

## Sheet: 1D
Wild Type	gdf6a	Vehicle	BMPi
227	250	188	226
202	266	203	250
197	245	252	310
232	292	196	271
209	316	212	244
208	301	207	253
214	288	175	349
219	300	196	276
207	290	236	289
224		205	212
216		209	291
			364
			311
			316
			326

## Sheet: 1E
tyrp1b
Wildtype	gdf6alf	Vehicle	BMPi
1.15405	1.30829	0.937106	1.36759
1.10411	1.3434	1.15011	1.54377
0.784812	2.0469	0.927833	1.88074
1.06486	1.90856	1.15426	1.2461
0.936068	1.91293	1.04776	1.20483
1.00323		0.826863	1.40029
tyr
Wildtype	gdf6a(lf)	Vehicle	BMPi
0.997468	1.67412	1.00338	2.7287
0.977921	2.26048	0.996631	2.71976
1.02517	2.06471	0.930894	1.75323
1.89217	5.07625	1.01571	1.36038
0.813534	5.69285	1.05762	1.44467
0.649628	2.29583		1.33393
mc1r
Wildtype	gdf6a(lf)	Vehicle	BMPi
1.70083	2.41805	0.997468	1.67412
1.68465	1.96049	0.977921	2.26048
0.349004	1.53354	1.02517	2.06471
0.995928	2.88112	1.89217	5.07625
0.98109	2.98355	0.813534	5.69285
1.02344	2.96286	0.649628	2.29583

## Sheet: S1A
wild type	gdf6a het	gdf6alf
227	194	250
202	192	266
197	174	245
232	204	292
209	253	316
208	182	301
214	193	288
219	177	300
207	227	290
224	206
216	243
247	228
197	170
195
207

## Sheet: S1B
Vehicle	BMPi
308	503
236	398
252	445
266	421
337	445

## Sheet: S1F
WT	gdf6b(lf)
0.936523	0.307873
1.09633	0.305163
0.973954	0.297176

## Sheet: S1I
HPF	12	24	72	96	120
wt	10	9	20	16	36
ga/+	24	21	31	32	56
ga	12	7	25	6	0
	46	37	76	54	92
morphology	edema	hydro	retina	length	dors.
72	16	5	24	24	18
96	5	4	6	6	6
