# Supplementary material for: Regulation of zebrafish melanocyte development by ligand-dependent BMP signaling
Source: eLife. 2019 Dec 23;8:e50047. doi: 10.7554/eLife.50047 (PMC6968919; doi:10.7554/eLife.50047)
Supplement: Figure 2—source data 1. [file elife-50047-fig2-data1.xlsx]

## Sheet: 2C
vehicle	bmpi
1.3634	1.88091
0.759194	1.31349
0.877408	1.37653

## Sheet: 2E
Vehicle	BMPi
1.36505	0.76987
0.653663	0.996019
0.866104	1.08263
1.4259	0.941417
1.23026	1.70942
1.36331	1.52245
0.541315	1.29916
1.02565	1.55628
0.776225	1.18105
0.949675	1.67808
0.969519	1.26307
0.905472	1.39694
1.03415	0.950602
0.861183	1.24719
0.972157	1.29916
1.06035	1.36631

## Sheet: S2C.1
vehicle	bmpi
1.06021	0.943945
0.941176	0.946713
0.941176	0.968858
1.05744	1.01038

## Sheet: S2C.2
vehicle	bmpi
1.15488	0.962963
0.989899	1.08418
1.01347	1.14815
0.841751	0.781145

## Sheet: S2F
crestin 12-14	edu+	edu-
vehicle	67.47	32.53
BMPi	72.53	27.47
crestin 16-18
vehicle	50.93	49.07
BMPi	45.65	54.35
crestin 20-22
vehicle	45.26	54.74
BMPi	46.15	53.85
mitfa 16-18
vehicle	23.08	76.92
BMPi	25.81	74.19
mitfa 20-22
vehicle	9	91
BMPi	9.73	90.27
