# Supplementary material for: Regulation of zebrafish melanocyte development by ligand-dependent BMP signaling
Source: eLife. 2019 Dec 23;8:e50047. doi: 10.7554/eLife.50047 (PMC6968919; doi:10.7554/eLife.50047)
Supplement: Figure 3—source data 1. [file elife-50047-fig3-data1.xlsx]

## Sheet: 3B
	gdf6a	mitfa
16HPF	0.966079	0.34012
	0.935579	0.346064
	1.10639	0.396715
	1.02818	0.150753
	0.977777	0.131133
	0.994698	0.153925
22 HPF	1.03996	13.7216
	1.12743	15.369
	0.852893	14.5886
	0.981356	8.53057
	0.904923	6.9234
	1.12606	7.35978

## Sheet: 3D
	pos	neg
Lead Edge	31	71
Rostral	13	173
