# Supplementary material for: Regulation of zebrafish melanocyte development by ligand-dependent BMP signaling
Source: eLife. 2019 Dec 23;8:e50047. doi: 10.7554/eLife.50047 (PMC6968919; doi:10.7554/eLife.50047)
Supplement: Figure 4—source data 1. [file elife-50047-fig4-data1.xlsx]

## Sheet: 4A
Control	mitfa:gdf6a
202	184
209	186
220	180
205	198
225	176
195	185
198	196
194

## Sheet: 4C
	Rescued	Not Rescued
Control	105	256
dnBMPR	152	41
SMAD1-DVD	23	129
