# Supplementary material for: Regulation of zebrafish melanocyte development by ligand-dependent BMP signaling
Source: eLife. 2019 Dec 23;8:e50047. doi: 10.7554/eLife.50047 (PMC6968919; doi:10.7554/eLife.50047)
Supplement: Figure 5—source data 1. [file elife-50047-fig5-data1.xlsx]

## Sheet: 5A
foxd3
Wildtype	gdf6a(lf)	Vehicle	BMPi
0.881551	1.06245	1.08381	0.575258
1.12176	1.1788	1.19065	0.893128
1.01124	1.04471	0.774929	1.09569
0.98804	0.922898	1.08233	1.21835
1.0087	0.736412	0.899475	0.942257
1.00338	0.753906	1.02719
sox10
Wildtype	gdf6a(lf)	Vehicle	BMPi
0.854211	0.700768	1.34495	0.928781
1.17855	0.743001	1.0906	0.723648
0.993314	0.711321	0.681757	0.485004
0.988417	0.762534	0.982448	0.544858
0.95701	0.79424	0.809552	0.814978
1.05717	0.816831	1.25732	0.923625
col2a1a
wt	gdf6alf	vehicle	BMPi
0.98035	0.622588	1.02212	0.610272
0.844201	0.605784	1.06749	0.620582
1.20829	0.651969	0.916502	0.441496
0.755359	0.827113	0.906516	0.735177
1.32387	0.744321	1.03229	0.879693
		1.06862	0.797254
mbpa
wt	gdf6alf	vehicle	BMPi
0.922824	0.87617	1.02883	0.707966
1.00366	1.07255	1.01744	0.737664
1.07968	1.07837	0.955315	0.693807
1.07797	0.888381	0.971079	0.461994
0.988891	0.903091	1.10915	0.617012
0.938095	0.907308	0.928444	0.529194
pomca
wt	gdf6alf	vehicle	BMPi
1.00829	0.979654	1.10835	0.925935
1.0117	0.911552	1.04174	1.2104
0.980308	0.964404	0.866092	1.16786
1.08798	1.0983	1.15405	0.568548
0.996461	1.08866	1.10411	1.19841
0.922395	1.30151	0.784812	1.23058
neurog1
wt	gdf6alf	vehicle	BMPi
1.12487	0.963521	1.01844	1.02278
1.05903	0.890794	1.00755	1.08943
0.839437	0.985144	0.974541	1.01908
0.959373	1.05225	1.11537	0.581324
1.23928	1.07793	0.896562	1.82054
0.841088
aox5
wt	gdf6alf	vehicle	BMPi
0.852094	1.19698	1.09155	0.883922
1.21408	0.859327	0.94534	0.9569
0.966644	0.82771	0.969098	1.37441
1.0407	1.09785	1.0874	0.93783
1.01204	1.12665	0.973074	0.897164
0.949463	1.18671	0.945072	0.85628
pnp4a
wt	gdf6alf	vehicle	BMPi
1.1354	0.777918	1.10227	0.48044
0.961607	0.595828	0.90304	0.570567
0.915913	0.57243	1.00463	0.747912
1.15287	0.76032	1.24033	0.738612
1.04699	0.647543	0.991526	0.783914
0.82847	0.546118	0.813125

## Sheet: 5B
Wild Type	gdf6a(lf)
39	30
41	35
43	26
32	26
45	20
	27

## Sheet: 5C
Vehicle	BMPi
44	28
40	24
45	31
41	27
31	32
37	34

## Sheet: S4A
WT/Het	foxd3 -/-
227	265
213	260
254	259
233	230
242	280
243	291
256	252
270	240
275	223
245
264
251
250
262
229
295
280
274
278
259
267
288

## Sheet: S4B
Vehicle	DMH1
1	0.9375
1	1
0.95	0.9166
1	1
0.95	0.93333

## Sheet: S4C
Vehicle	DMH1
4	2
4	2
5	2
4	2
3	2
3	1
4	2
4	3
3	3
2	3
3	3
2	3
3	2
2	4
4	3
4	3
3	3
2	3
3	3
4	4
4	3
4	4
4	3
3	4
2	5
3	4
3	3
3	3
3	3

## Sheet: S4D
Vehicle	DMH1
41	38
40	40
42	41
40	39

## Sheet: S4F
Vehicle	BMPi
1	3
1	4
2	1
3	1
1	2
2	2
1	3
2	3
	2
	3
	4
	3
