# Supplementary material for: Regulation of zebrafish melanocyte development by ligand-dependent BMP signaling
Source: eLife. 2019 Dec 23;8:e50047. doi: 10.7554/eLife.50047 (PMC6968919; doi:10.7554/eLife.50047)
Supplement: Figure 6—source data 1. [file elife-50047-fig6-data1.xlsx]

## Sheet: 6B
	mel	irid
veh	71	30
bmpi	67	13
