# Supplementary material for: Regulation of zebrafish melanocyte development by ligand-dependent BMP signaling
Source: eLife. 2019 Dec 23;8:e50047. doi: 10.7554/eLife.50047 (PMC6968919; doi:10.7554/eLife.50047)
Supplement: Figure 7—source data 1. [file elife-50047-fig7-data1.xlsx]

## Sheet: 7A
crest veh	crest bmpi	mitfa veh	mitfa bmpi
1.01097	2.84945	0.94347	4.68277
0.957812	2.64636	1.05992	6.28422
1.03272	3.07448	1.15876	8.25575
1.05813	1.87403	1.06542	5.14342
0.941875	2.46196		4.97552

## Sheet: 7C.1
Vehicle	BMPi
1.40815	6.1064
0.797065	3.81705
0.358679	5.33148
0.473811	3.8392
0.336538	3.70635
0.721786	4.71597
0.699646	3.65321
0.64208	2.01037
0.828062	2.57718
1.17346	2.10779
0.876771	1.83768
0.894484	1.88639
0.983047	1.69598
0.929909	2.0458
1.3063	2.40448
0.526948	2.53732
0.673077	1.66941
0.655364	2.09008
0.841346	2.09008
1.31959	2.53289
1.85096	3.37867
2.50633	2.59932
0.695218	5.75215
1.69155	3.6665
2.97128	1.93952
2.96242	2.0148
0.934337	1.9041
0.407389	1.17346
0.30997	1.71369
0.495951	2.26721
0.487095	2.49747
0.318826	2.30263
1.08047	3.36981
0.938765	3.69307
0.90334	3.85248
0.743059	2.7853
0.510343	2.55946
0.0775721	3.40967
0.979858	3.01113
0.812466	2.43105
1.10642	1.6207
1.73517	3.53365
1.83315	2.39562
1.58002	2.958
1.66576	1.46979
2.53947	1.74333
1.02069	2.55988
1.17175	2.87017
1.53103	2.47006
1.43304	2.55988
1.26565	2.01688
0.547088	3.91535
0.465433	3.0294
0.420523	0.808383
1.42079	0.71448
0.9227	2.36391
0.738977	2.75585
1.05743	2.00871
0.808383	2.37616
0.881873	2.22918
0.583832	1.97197
0.567501	2.89467
0.636908	1.40855
0.473598	2.02504
0.469516	2.46189
	2.82118
	2.5068
	-0.1184
	3.32744
	1.62493
	1.7515
	1.53919
	2.47414
	1.76783

## Sheet: 7C.2
Vehicle	BMPi
1.1039	1.46386
2.1502	3.93083
0.758329	2.36138
0.335968	2.71654
2.24619	1.43986
1.52146	2.92772
0.811124	0.945511
0.604743	3.10051
0.662338	1.75913
0.652739	1.5074
0.451158	1.53406
0.647939	-0.3613
0.518351	2.95854
1.00311	2.28332
1.29108	1.87167
1.23828	1.48667
1.00311	1.09279
1.13426	1.76209
0.716683	0.980257
0.864758	0.618954
0.461994	0.459033
0.254689	0.6308
0.136229	1.82428
0.219151	3.44126
0.607108	2.30701
0.740375	1.88648
1.69398	2.83119
1.5459	1.17572
1.3001	1.75025
1.4926	0.663376
1.59625
1.08983
0.92695
2.33959
0.879566

## Sheet: 7D
vehicle	bmpi
48	42
44	43
44	44
39	43
47	41
37	45
43	39
	41
	45
